# Supplementary material for: Seed Priming with Brassinosteroids Alleviates Chromium Stress in Rice Cultivars via Improving ROS Metabolism and Antioxidant Defense Response at Biochemical and Molecular Levels
Source: MDPI journal article supplement (doi:10.3390/antiox10071089), 2021-07-07
Supplement: s1 [file s1]

## Supplementary Materials

Table S1. Primers information

| Locus              | Primer names            | Primer sequences           |
|--------------------|-------------------------|----------------------------|
| LOC_4328073-F      | CATa-1 (F)              | GGAAGCTGTTCGTCCAGGTGAT     |
| LOC_4328073-R      | CATa-2 (R)              | TCCGGCCATGTCTTGGTGTC       |
| LOC_4342124-F      | CATb-1 (F)              | TTCTCCAGCGGTGGGTTGAT       |
| LOC_4342124-R      | CATb-2 (R)              | CCAAGGGACGCATCACACTG       |
| LOC_4340091-F      | SOD-Fe <sub>2</sub> (F) | AGAAAAGATGGCGGCTTTC        |
| LOC_4340091-R      | SOD-Fe <sub>2</sub> (R) | CCCTGCCTTGTCTCTCG          |
| LOC_4346329-F      | SOD-Cu-Zn (F)           | GGACTTACTCCTGGACTTCACG     |
| LOC_4346329-R      | SOD-Cu-Zn (R)           | GTTTGGGTAAAATGTGGTCCT      |
| LOC_4333919-F      | OsActin-1(F)            | CTTCATAGGAATGGAAGCTGCGGGTA |
| LOC_4333919-R      | OsActin-2 (R)           | CGACCACCTTGATCTTCATGCTGCTA |
| LOC_Os07g0694700-F | OsAPX02 (F)             | ACCTGAGGTCCCCTTCCAT        |
| LOC_Os07g0694700-R | OsAPX02 (R)             | CCTGCCTTAGGTGGTCAGAA       |
| LOC_Os02g0553200-F | OsAPx08(F)              | GTGTGCCCCTGATCATCTTA       |
| LOC_Os02g0553200-R | OsAPx08 (R)             | TTTCCCCAGCCACTCCTGTCA      |

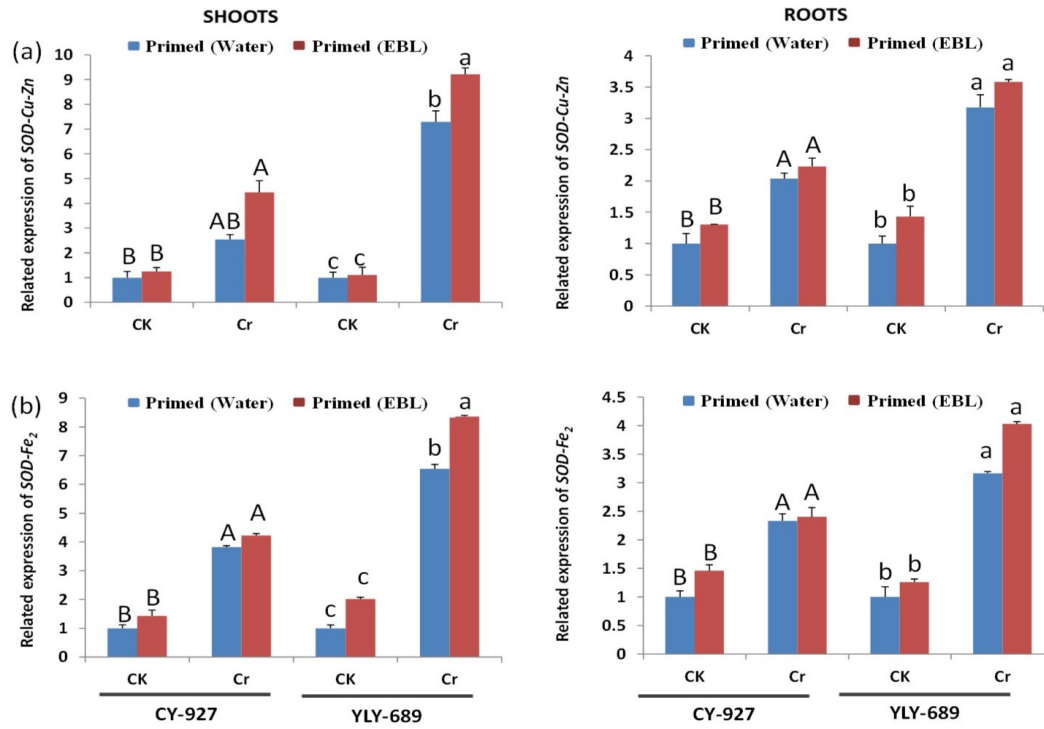

**Figure S1.** Gene expression of (a) *SOD-Cu-Zn* and (b) *SOD-Fe<sub>2</sub>* in both rice cultivars; primed with water as well as primed with 0.01 $\mu$ M EBL under 100 $\mu$ M Cr toxicity. (A) Control (CK); (B) Chromium (Cr). The values presented are means  $\pm$  SDs (n = 3). Different letters above bars show significant difference at  $p < 0.05$  among treatments.

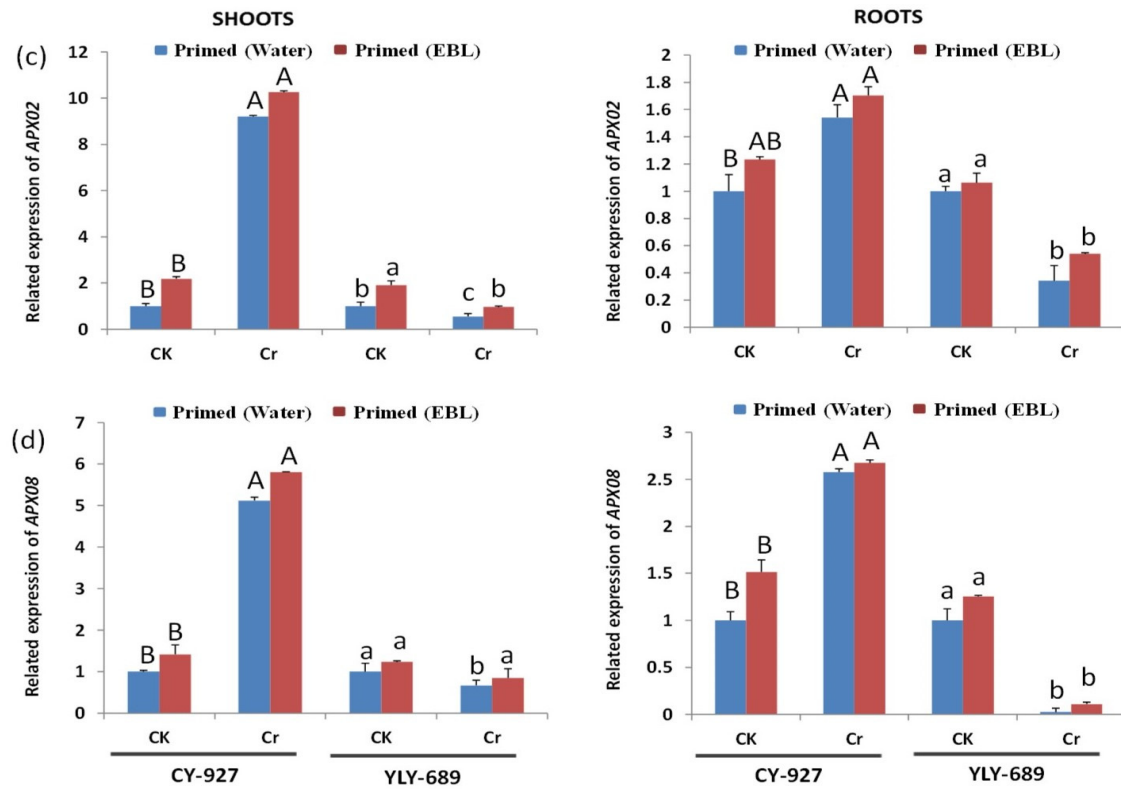

**Figure S2.** Effect of seed priming with 0.01 $\mu$ M EBL as compared to seed priming with water on gene expression of (c) *APX02* and (d) *APX08* under toxicity of Cr (100 $\mu$ M) concentration on both rice cultivars. (A) Control (CK); (B) Chromium (Cr). The values presented are means  $\pm$  SDs ( $n = 3$ ). Different letters above bars show significant difference at  $p < 0.05$  among treatments.

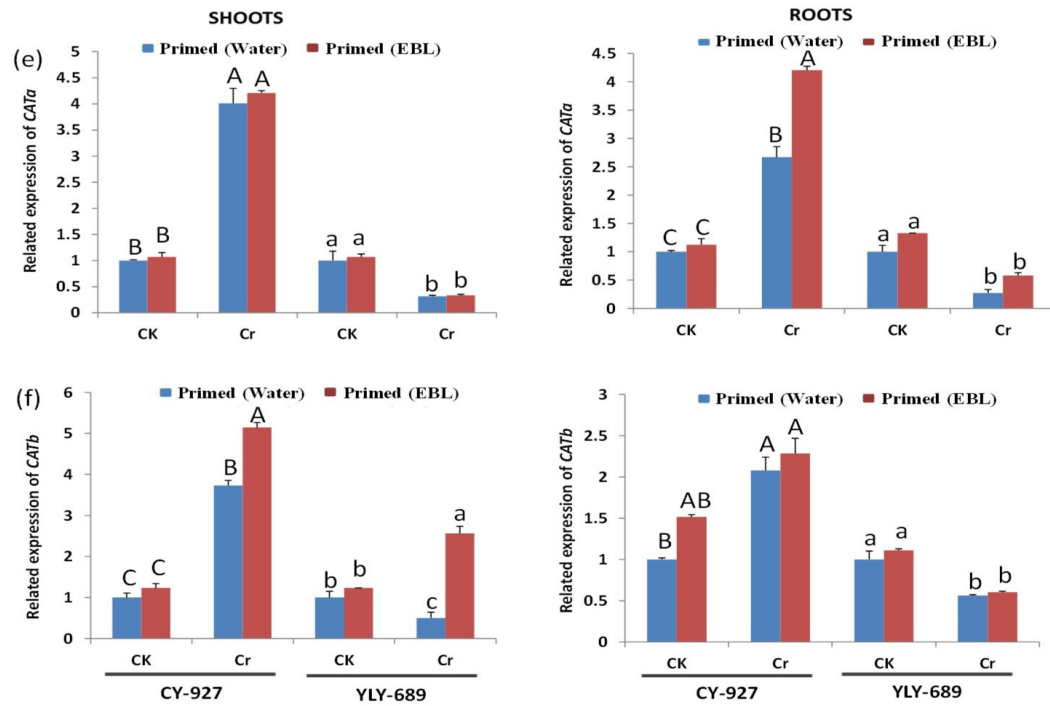

**Figure S3.** Effect of seed priming with 0.01 $\mu$ M EBL on gene expression of (e) *CATa*, (f) *CATb* in shoots and roots of both cultivars of rice under toxicity of 100 $\mu$ M Cr. (A) Control (CK); (B) Chromium (Cr). The values presented are means  $\pm$  SDs (n = 3). Different letters above bars show significant difference at  $p < 0.05$  among treatments.

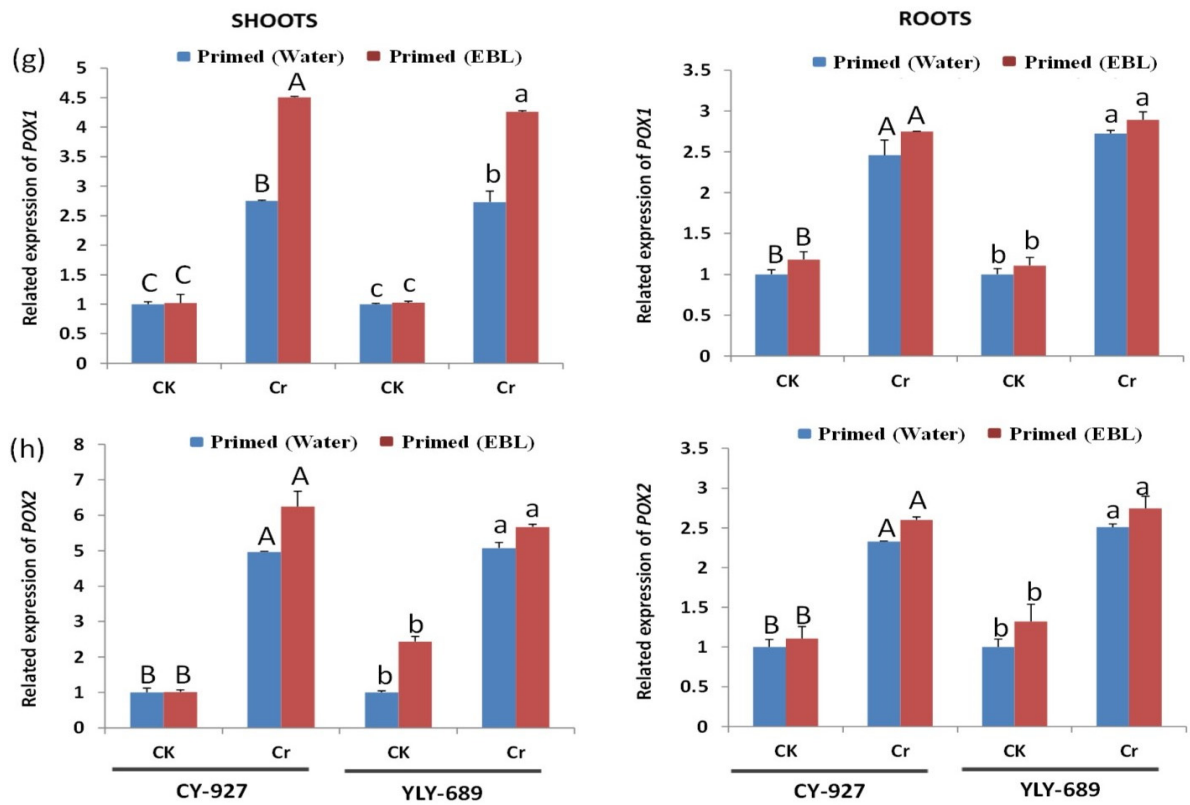

**Figure S4.** Effect of seed priming with 0.01 $\mu$ M EBL on transcription level of (g) *POX1*, (h) *POX2* under 100 $\mu$ M Cr stress in both rice cultivars. (A) Control (CK); (B) Chromium (Cr). The values presented are means  $\pm$  SDs (n = 3). Different letters above bars show significant difference at p < 0.05 among treatments.

**Table S2.** Cr uptake and accumulation in shoots with or without effect of seed priming with EBL (0.01 $\mu$ M) in both rice cultivars.

| Treatment                    | Cr                           | Mn                           | Cu                            | Zn                            |
|------------------------------|------------------------------|------------------------------|-------------------------------|-------------------------------|
|                              | mg/g                         | mg/g                         | mg/g                          | mg/g                          |
| CY-927-H <sub>2</sub> O      | -                            | 1.56 $\pm$ 0.02 <sup>a</sup> | 0.05 $\pm$ 0.02 <sup>a</sup>  | 0.24 $\pm$ 0.09 <sup>a</sup>  |
| CY927-EBL                    | -                            | 1.14 $\pm$ 0.02 <sup>a</sup> | 0.04 $\pm$ 0.01 <sup>ab</sup> | 0.19 $\pm$ 0.02 <sup>ab</sup> |
| CY-927- H <sub>2</sub> O+Cr  | 0.38 $\pm$ 0.06 <sup>a</sup> | 0.14 $\pm$ 0.05 <sup>b</sup> | 0.02 $\pm$ 0.01 <sup>c</sup>  | 0.08 $\pm$ 0.02 <sup>c</sup>  |
| CY927-EBL+Cr                 | 0.24 $\pm$ 0.06 <sup>b</sup> | 0.26 $\pm$ 0.07 <sup>b</sup> | 0.03 $\pm$ 0.01 <sup>ab</sup> | 0.14 $\pm$ 0.03 <sup>bc</sup> |
| YLY-689-H <sub>2</sub> O     | -                            | 1.36 $\pm$ 0.02 <sup>a</sup> | 0.04 $\pm$ 0.01 <sup>a</sup>  | 0.16 $\pm$ 0.05 <sup>a</sup>  |
| YLY-689-EBL                  | -                            | 1.06 $\pm$ 0.09 <sup>a</sup> | 0.09 $\pm$ 0.01 <sup>a</sup>  | 0.15 $\pm$ 0.04 <sup>a</sup>  |
| YLY-689- H <sub>2</sub> O+Cr | 0.52 $\pm$ 0.03 <sup>a</sup> | 0.24 $\pm$ 0.06 <sup>b</sup> | 0.03 $\pm$ 0.01 <sup>a</sup>  | 0.11 $\pm$ 0.02 <sup>a</sup>  |
| YLY-689-EBL+Cr               | 0.35 $\pm$ 0.05 <sup>b</sup> | 0.27 $\pm$ 0.02 <sup>b</sup> | 0.03 $\pm$ 0.01 <sup>a</sup>  | 0.12 $\pm$ 0.03 <sup>a</sup>  |

(A) Chromium (Cr); (B) Manganese (Mn); (C) Copper (Cu) (D) Zinc (Zn). Each value is demonstrating the mean of three replicates of every treatment. Same letters are representing no significant differentiation at 95% probability level (p<0.05.).

**Table S3.** EBL application effect on Cr uptake and accumulation as well as macronutrient balance in roots of both cultivars of rice.

| Treatment                    | Cr                     | Mn                      | Cu                      | Zn                      |
|------------------------------|------------------------|-------------------------|-------------------------|-------------------------|
|                              | mg/g                   | mg/g                    | mg/g                    | mg/g                    |
| CY-927-H <sub>2</sub> O      | -                      | 0.25±0.06 <sup>a</sup>  | 0.07±0.04 <sup>a</sup>  | 0.17±0.05 <sup>ab</sup> |
| CY927-EBL                    | -                      | 0.15±0.06 <sup>a</sup>  | 0.08±0.05 <sup>a</sup>  | 0.19±0.02 <sup>ab</sup> |
| CY-927- H <sub>2</sub> O+Cr  | 2.95±0.04 <sup>a</sup> | 0.09±0.02 <sup>ab</sup> | 0.04±0.01 <sup>ab</sup> | 0.19±0.07 <sup>ab</sup> |
| CY927-EBL+Cr                 | 2.09±0.04 <sup>b</sup> | 0.18±0.01 <sup>a</sup>  | 0.08±0.02 <sup>a</sup>  | 0.37±0.40 <sup>a</sup>  |
| YLY-689-H <sub>2</sub> O     | -                      | 0.32±0.02 <sup>a</sup>  | 0.12±0.08 <sup>a</sup>  | 0.20±0.11 <sup>a</sup>  |
| YLY-689-EBL                  | -                      | 0.31±0.09 <sup>a</sup>  | 0.12±0.03 <sup>a</sup>  | 0.16±0.05 <sup>ab</sup> |
| YLY-689- H <sub>2</sub> O+Cr | 3.55±0.48 <sup>a</sup> | 0.05±0.03 <sup>b</sup>  | 0.03±0.01 <sup>b</sup>  | 0.06±0.04 <sup>b</sup>  |
| YLY-689-EBL+Cr               | 1.86±0.74 <sup>b</sup> | 0.12±0.04 <sup>ab</sup> | 0.09±0.02 <sup>ab</sup> | 0.14±0.02 <sup>ab</sup> |

(A) Chromium (Cr); (B) Manganese (Mn); (C) Copper (Cu) (D) Zinc (Zn). Each value is demonstrating the mean of three replicates of every treatment. Same letters are representing no significant differentiation at 95% probability level (p<0.05).
